# Supplementary material
Source: HighWire-hosted journal article supplement (https://stke.sciencemag.org/content/suppl/2010/08/06/3.134.ra60)
Supplement: 3_ra60_SM.pdf [file 3_ra60_SM.pdf]

Supplementary Materials for  
**The PI3K Isoforms p110 $\alpha$  and p110 $\delta$  Are Essential for Pre-B Cell  
Receptor Signaling and B Cell Development**

Faruk Ramadani, Daniel J. Bolland, Fabien Garcon, Juliet L. Emery, Bart  
Vanhaesebroeck, Anne E. Corcoran, Klaus Okkenhaug\*

\*To whom correspondence should be addressed. E-mail: klaus.okkenhaug@bbsrc.ac.uk

Published 10 August 2010, *Sci. Signal.* **3**, ra60 (2010)

DOI: 10.1126/scisignal.2001104

**The PDF file includes:**

Fig. S1. B cell development is intact in the absence of p110 $\beta$  and p110 $\delta$  activities.

Fig. S2. Deficiency in p110 $\beta$  does not affect B cell maturation in the spleen.

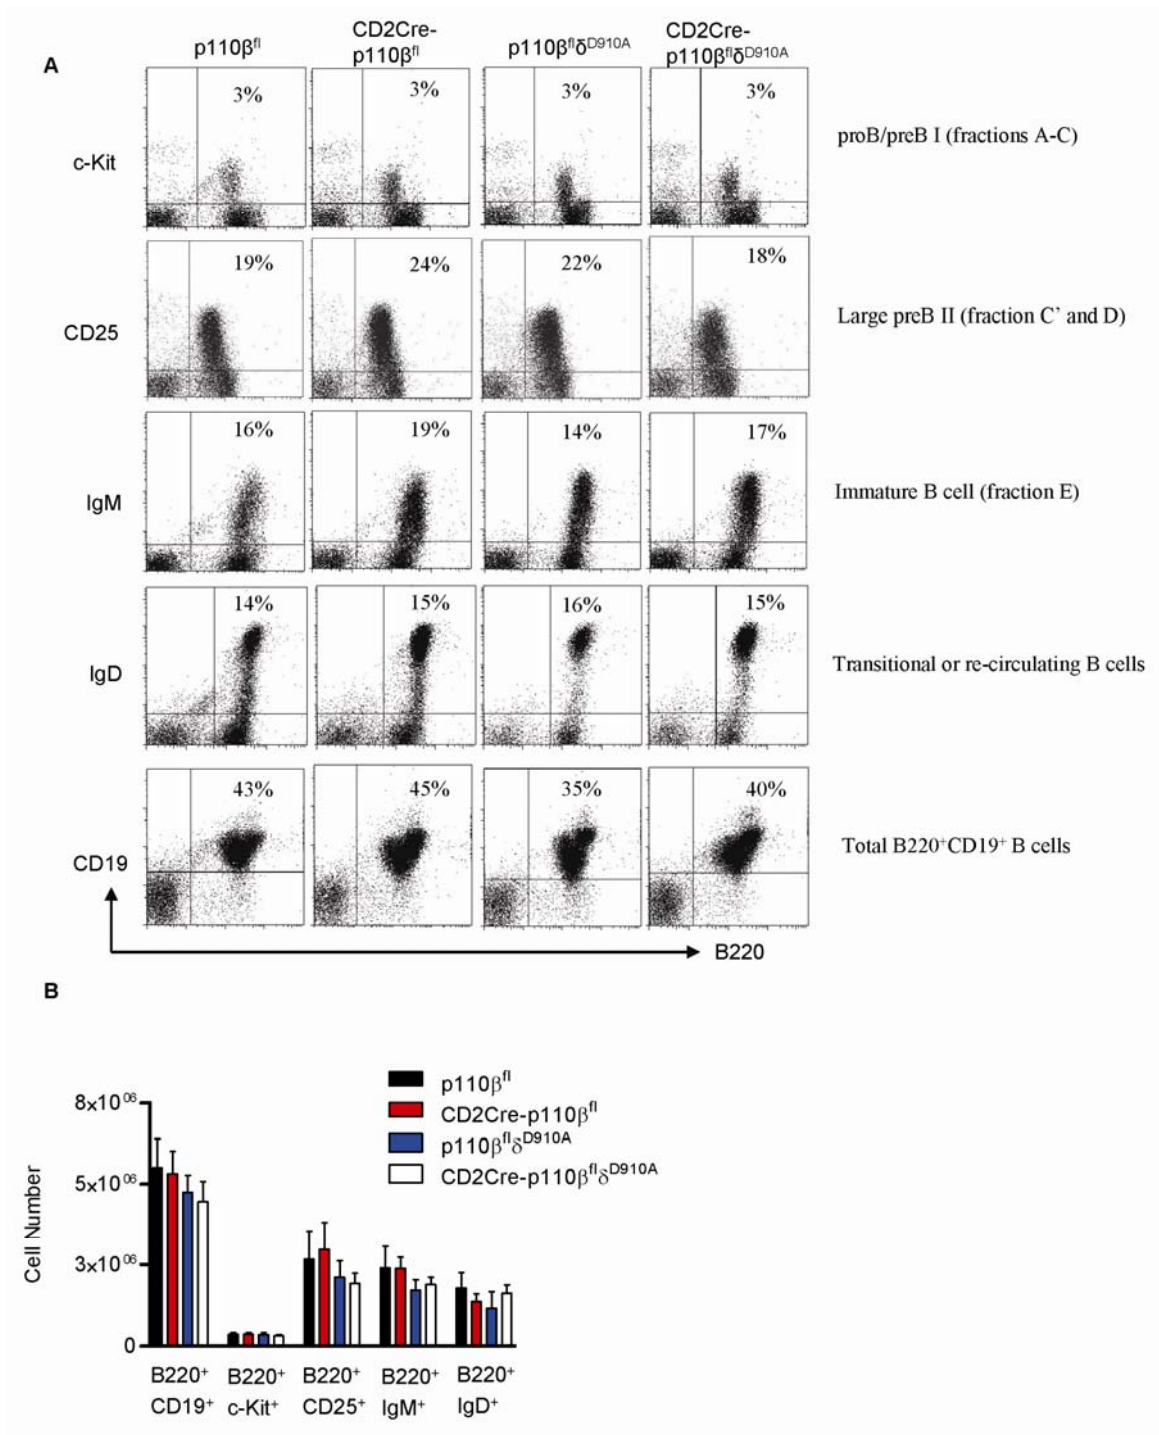

**Fig. S1.** B cell development is intact in the absence of p110β and p110δ activities. **(A)** Flow cytometric analysis of bone marrow lymphocytes. The percentages in each quadrant or gate are averages. p110β<sup>fl</sup> (n = 6 mice); CD2Cre-p110β<sup>fl</sup> (n = 8 mice); CD2Cre-p110β<sup>fl</sup>Δ<sup>D910A</sup> (n = 13 mice). **(B)** Total number of each B cell subset from two femurs (± SEM).

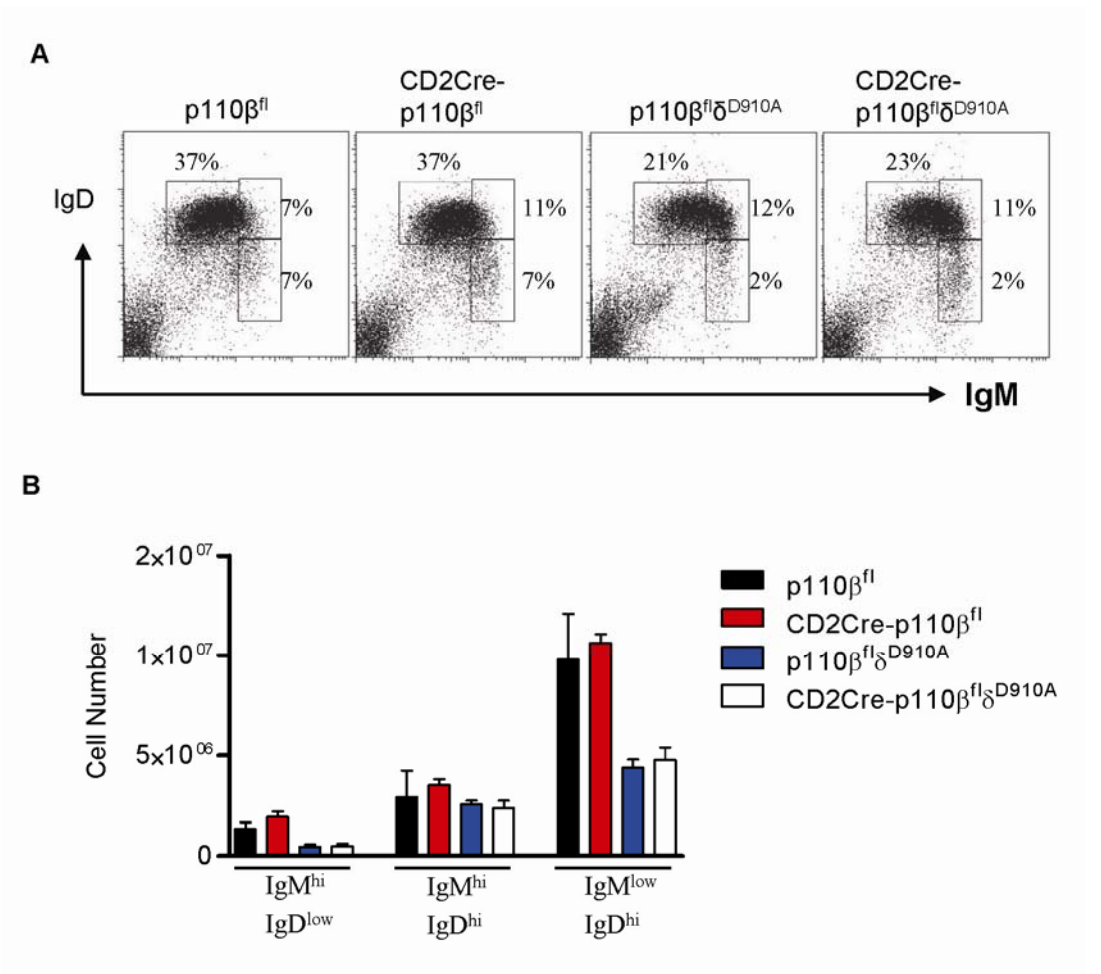

**Fig. S2.** Deficiency in p110β does not affect B cell maturation in the spleen. **(A)** Splenocytes from p110β<sup>fl</sup> (n = 11 mice), CD2Cre-p110β<sup>fl</sup> (n = 6 mice), p110β<sup>fl</sup>δ<sup>D910A</sup> (n = 11 mice), and CD2Cre-p110β<sup>fl</sup>δ<sup>D910A</sup> (n = 11 mice) were analyzed by flow cytometry for the presence of surface IgD and IgM. **(B)** Numbers of immature (IgM<sup>high</sup>IgD<sup>low</sup> or IgM<sup>high</sup>IgD<sup>hi</sup>) and mature (IgM<sup>low</sup>IgD<sup>high</sup>) B cells (± SEM).
